# Supplementary figures and images for: Preparation and model of high-performance shape-memory polyurethane with hydroxylated perylene bisimide
Source: Royal Society of Chemistry journal article supplement (doi:10.1039/c6ra24393b), 2016-01-01

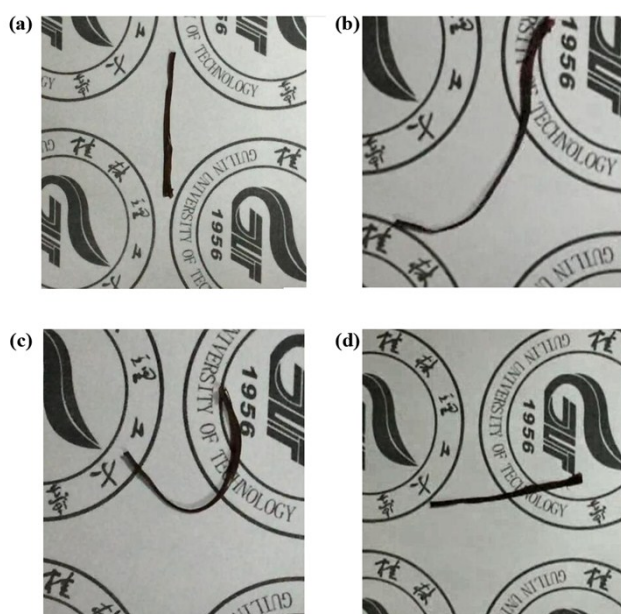

**Fig. 1s** The optical images of shape memory behavior of the PSMP

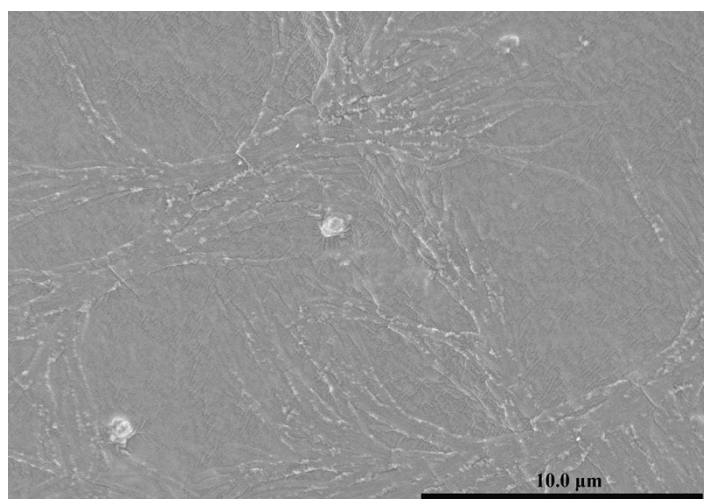

**Fig. 2s** SEM image of sliced PSMP-3

Supplement: c6ra24393b1.pdf [file c6ra24393b1.pdf]
